# Supplementary material for: Fault Detection in Offshore Structures: Influence of Sensor Number, Placement and Quality
Source: MDPI journal article supplement (doi:10.3390/applmech3030045), 2022-06-27
Supplement: s1 [file s1]

## Supplementary Materials:

**Table S1.** Locations of defect sensors for rope fault in rope number 8 and 1.

| Number of defect sensors:          |                             |             | 1       | 2               | 4                            | 5                                     | 8                                                          | 10                                                                      |
|------------------------------------|-----------------------------|-------------|---------|-----------------|------------------------------|---------------------------------------|------------------------------------------------------------|-------------------------------------------------------------------------|
| Defect sensors version B in %:     |                             |             | 1.3     | 2.6             | 5.3                          | -                                     | 10.7                                                       | -                                                                       |
| Defect sensors version F in %:     |                             |             | 1       | 2               | -                            | 5                                     | -                                                          | 10                                                                      |
| Platform number with defect sensor | Rope fault in rope number 8 | dist-0*:    | 3<br>13 | 3, 13<br>18, 23 | 3, 8, 18, 23                 | 3, 8, 13, 18, 23                      | 3, 8, 13, 23, 18, 2, 12, 24                                | 3, 8, 13, 18, 23, 2, 12, 22, 9, 19                                      |
|                                    |                             | dist-1:     | 2<br>17 | 2, 12<br>7, 19  | 2, 7, 17, 22<br>2, 4, 22, 24 | 2, 12, 22, 4, 24<br>7, 17, 4, 14, 19  | 2, 7, 17, 22, 4, 9, 19, 24                                 | 2, 7, 12, 17, 22, 4, 9, 14, 19, 24                                      |
|                                    |                             | dist-2:     | 1<br>11 | 1, 11<br>1, 5   | 1, 11, 5, 20<br>1, 21, 5, 25 | 1, 11, 21, 10, 20<br>6, 16, 5, 15, 25 | 1, 6, 16, 21, 5, 10, 20, 25                                | 1, 6, 11, 16, 21, 5, 10, 15, 20, 25                                     |
|                                    |                             | dist-var:   | -       | -               | 15, 12, 1, 9<br>5, 20, 8, 15 | 15, 12, 1, 9, 3<br>5, 20, 8, 15, 17   | 5, 16, 7, 17, 18, 19, 12, 3<br>6, 23, 4, 21, 14, 25, 2, 12 | 3, 25, 1, 20, 21, 22, 3, 10, 7, 21<br>6, 9, 21, 1, 2, 5, 17, 19, 10, 12 |
|                                    |                             | dist-com-0: | -       | -               | 18 <sub>3</sub> , 13         | 18 <sub>4</sub> , 13                  | 3 <sub>3</sub> , 8 <sub>3</sub> , 13 <sub>2</sub>          | 3 <sub>4</sub> , 8 <sub>4</sub> , 13 <sub>2</sub>                       |
|                                    |                             | dist-com-1: | -       | -               | 7 <sub>3</sub> , 12          | 7 <sub>4</sub> , 12                   | 9 <sub>3</sub> , 14 <sub>3</sub> , 19, 4                   | 9 <sub>4</sub> , 14 <sub>4</sub> , 19 <sub>2</sub>                      |
|                                    |                             | dist-com-2: | -       | -               | 1 <sub>3</sub> , 6           | 1 <sub>4</sub> , 6                    | 10 <sub>3</sub> , 15 <sub>3</sub> , 20, 5                  | 10 <sub>4</sub> , 15 <sub>4</sub> , 20 <sub>2</sub>                     |
|                                    | Rope fault in rope number 1 | dist-0*:    | 1<br>11 | 1, 6<br>11, 21  | 1, 6, 11, 16                 | 1, 6, 11, 16, 21                      | 1, 6, 11, 16, 21, 2, 12, 22                                | 1, 6, 11, 16, 21, 2, 7, 12, 17, 22                                      |
|                                    |                             | dist-1*:    | 2<br>17 | 2, 12<br>7, 22  | 2, 7, 17, 22                 | 2, 7, 12, 17, 22                      | 2, 7, 17, 22, 12, 1, 3, 18                                 | 2, 7, 12, 17, 22, 1, 3, 21, 23, 18                                      |
|                                    |                             | dist-2*:    | 3<br>18 | 3, 13<br>8, 23  | 3, 8, 18, 23                 | 3, 8, 13, 18, 23                      | 3, 8, 18, 23, 13, 2, 4, 19                                 | 3, 8, 13, 18, 23, 2, 4, 22, 24, 19                                      |
|                                    |                             | dist-3*:    | 4<br>19 | 4, 14<br>9, 19  | 4, 9, 19, 24                 | 4, 9, 14, 19, 24                      | 4, 9, 19, 24, 14, 3, 5, 20                                 | 4, 9, 14, 19, 24, 3, 5, 23, 25, 20                                      |
|                                    |                             | dist-4*:    | 5<br>20 | 5, 15<br>5, 20  | 5, 10, 20, 25                | 5, 10, 15, 20, 25                     | 5, 10, 15, 20, 25, 4, 14, 24                               | 5, 10, 15, 20, 25, 4, 9, 14, 24, 19                                     |
|                                    |                             | dist-var:   | -       | -               | 15, 12, 1, 9<br>5, 20, 8, 15 | 3, 8, 13, 18, 23<br>21, 7, 14, 20, 5  | 5, 16, 7, 17, 18, 19, 12, 3<br>6, 23, 4, 21, 14, 25, 2, 12 | 5, 25, 1, 20, 21, 22, 3, 10, 7, 21<br>6, 9, 21, 1, 2, 5, 17, 19, 10, 12 |
|                                    |                             | dist-com-0: | -       | -               | 6 <sub>3</sub> , 1           | 6 <sub>4</sub> , 11                   | 6 <sub>3</sub> , 11 <sub>3</sub> , 16 <sub>2</sub>         | 6 <sub>4</sub> , 11 <sub>4</sub> , 16 <sub>2</sub>                      |
|                                    |                             | dist-com-2: | -       | -               | 8 <sub>3</sub> , 13          | 8 <sub>4</sub> , 13                   | 8 <sub>3</sub> , 13 <sub>3</sub> , 18 <sub>2</sub>         | 8 <sub>4</sub> , 13 <sub>4</sub> , 18 <sub>2</sub>                      |
|                                    |                             | dist-com-4: | -       | -               | 10 <sub>3</sub> , 5          | 10 <sub>4</sub> , 5                   | 10 <sub>3</sub> , 5 <sub>3</sub> , 15 <sub>2</sub>         | 10 <sub>4</sub> , 5 <sub>4</sub> , 15 <sub>2</sub>                      |

**Table S2.** Number of defect sensors per platform arrangement and number of simulations calculated for the respective number of defect sensors executed for rope fault detection in rope number 8.

|                   | Number of defect sensors |   |   |    |
|-------------------|--------------------------|---|---|----|
|                   | 1                        | 2 | 4 | 8  |
| Sensors setting B | 1                        | 2 | 4 | 8  |
| Sensors setting F | 1                        | 2 | 5 | 10 |
|                   | Number of simulations    |   |   |    |
|                   | 2                        | 2 | 1 | 1  |
| dist-0*           | 2                        | 2 | 1 | 1  |
| dist-1            | 2                        | 2 | 2 | 1  |
| dist-2            | 2                        | 2 | 2 | 1  |
| dist-var          | -                        | - | 2 | 2  |
| dist-com-0        | -                        | - | 1 | 1  |
| dist-com-1        | -                        | - | 1 | 1  |
| dist-com-2        | -                        | - | 1 | 1  |

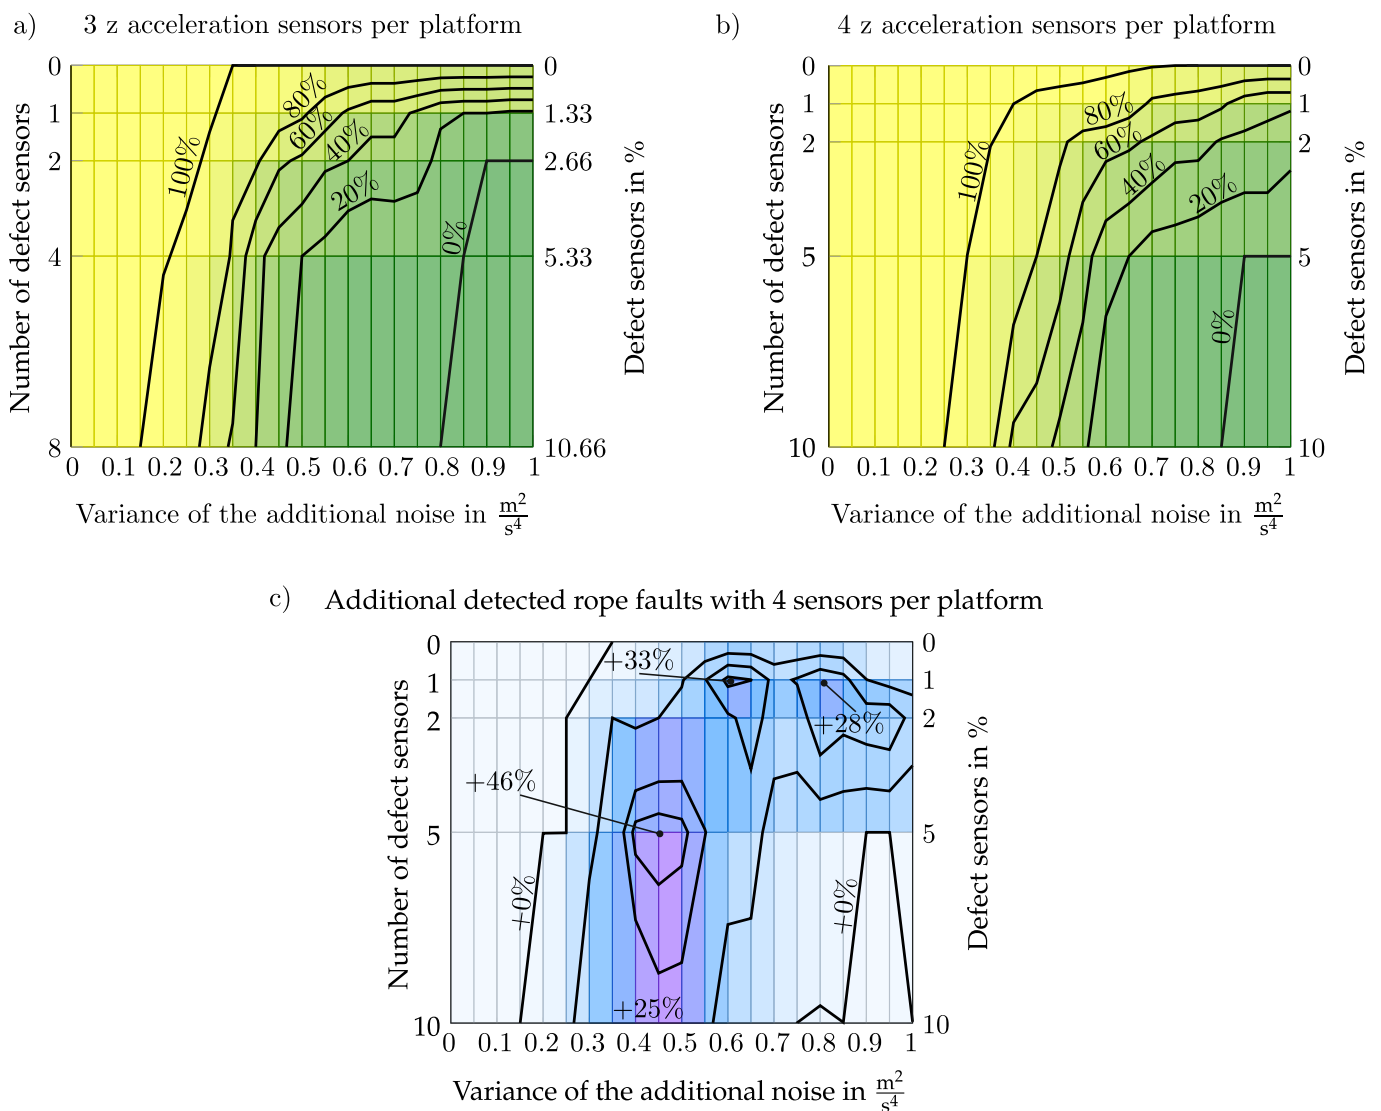**Figure S1.** Impact of sensor precision degradation on the percentage of correct detected rope faults by the EKF rope fault estimation for a rope fault in rope number 8. (a) 3 z acceleration sensors and (b) 4 z acceleration sensors per platform are used. (c) Improvement of fault detection using 4 z acceleration sensors.

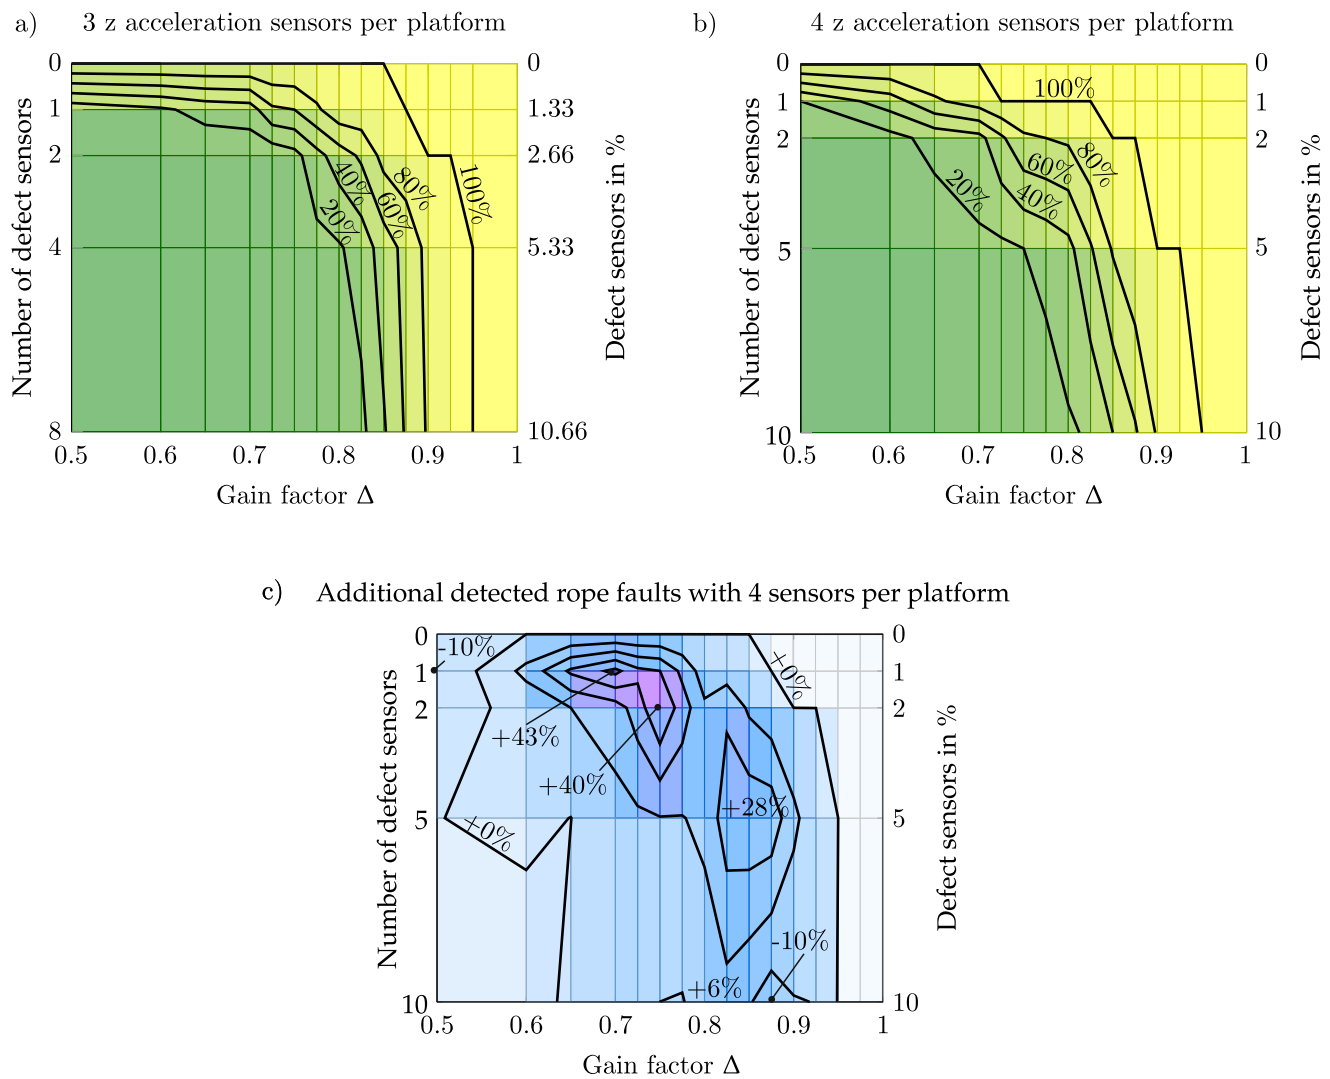

**Figure S2.** Impact of sensor gain defects on the percentage of correct detected rope faults by the EKF rope fault estimation for a rope fault in rope number 8. **(a)** 3 z acceleration sensors and **(b)** 4 z acceleration sensors per platform are used. **(c)** Improvement of fault detection using 4 z acceleration sensors.

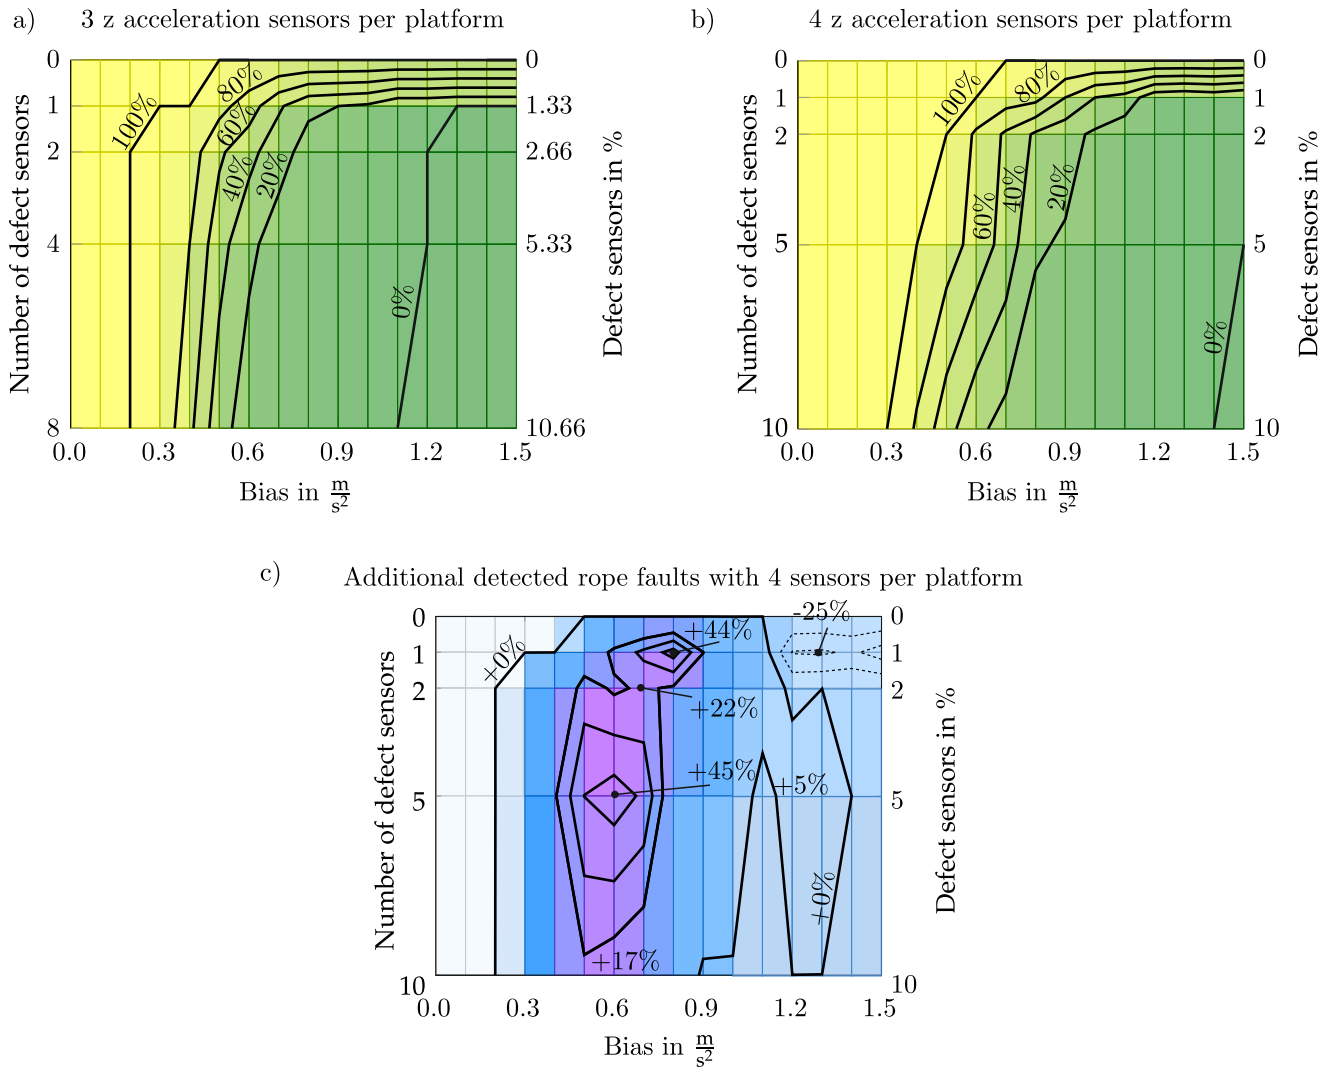

**Figure S3.** Impact of sensor bias defects on the percentage of correct detected rope faults by the EKF rope fault estimation for a rope fault in rope number 8. **(a)** 3 z acceleration sensors and **(b)** 4 z acceleration sensors per platform are used. **(c)** Improvement of fault detection using 4 z acceleration sensors.

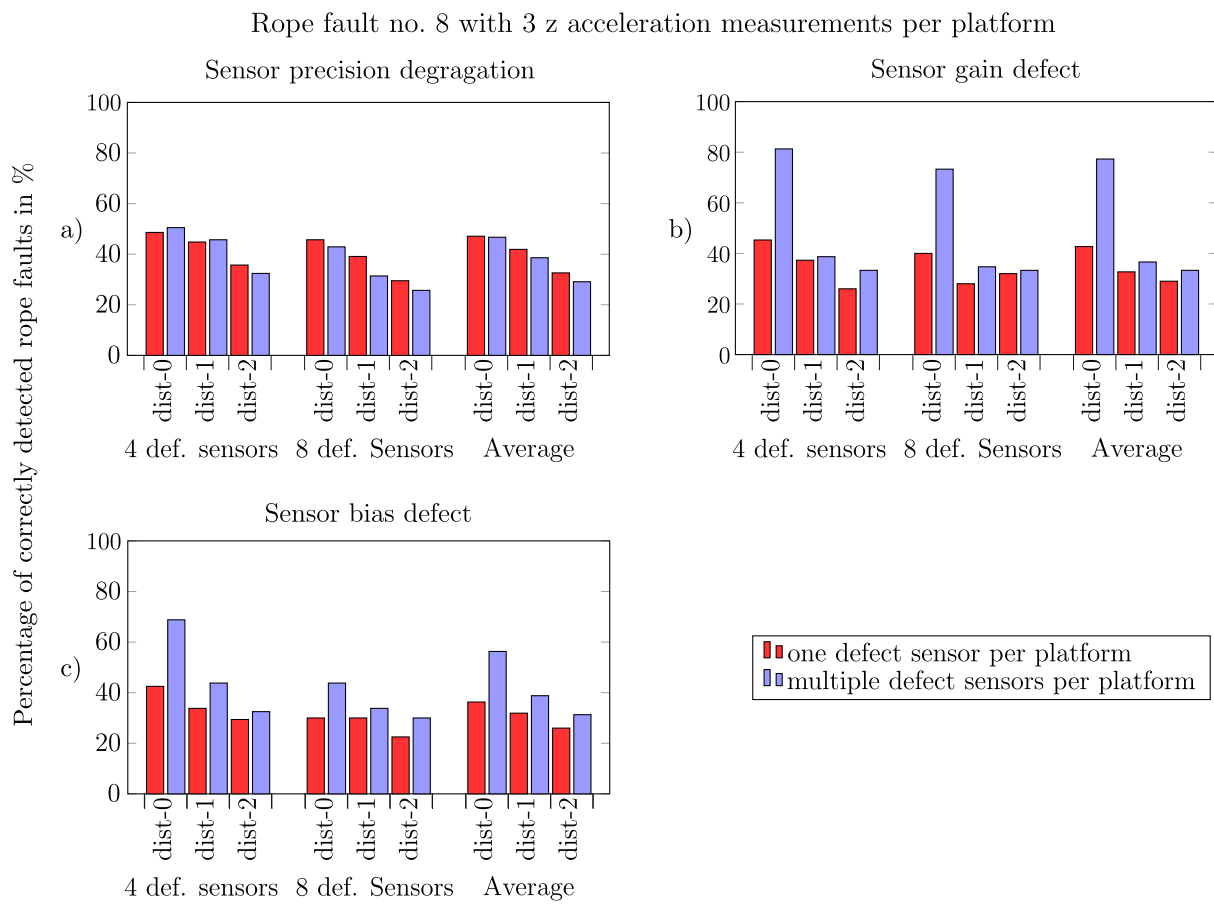

**Figure S4.** Comparison of single and multiple sensor defects per platform on the reliability of rope fault detection for a rope fault in rope number 8 with 3 z acceleration sensors per platform. Results for three different distances between defect sensors and the rope fault are shown: **(a)** For sensor precision degradation, **(b)** for sensor gain defects and **(c)** for sensor bias defects.

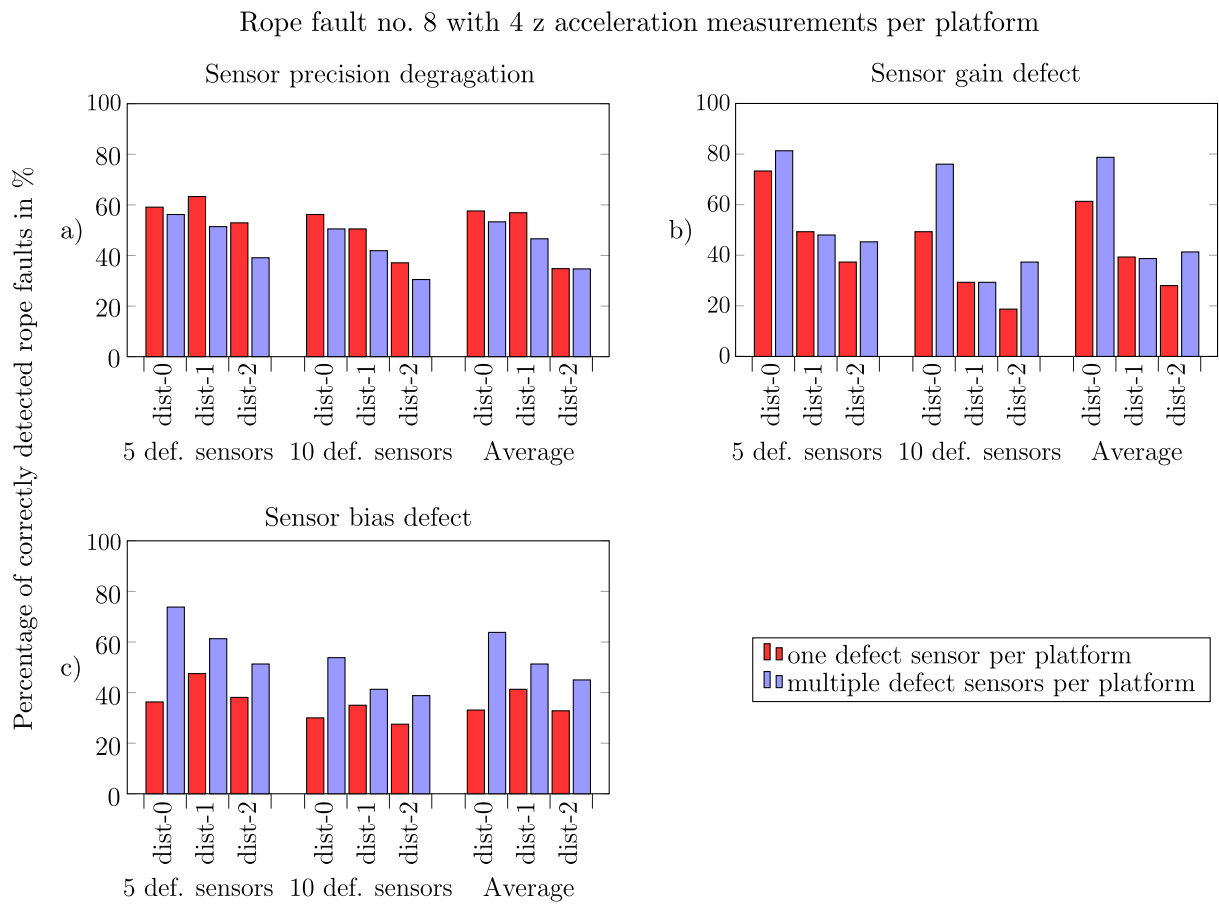

**Figure S5.** Comparison of single and multiple sensor defects per platform on the reliability of rope fault detection for a rope fault in rope number 8 with 3 z acceleration sensors per platform. Results for three different distances between defect sensors and the rope fault are shown: **(a)** For sensor precision degradation, **(b)** for sensor gain defects and **(c)** for sensor bias defects.
